# Supplementary material for: Data quantity is more important than its spatial bias for predictive species distribution modelling
Source: PeerJ journal article supplement (doi:10.7717/peerj.10411), 2020-11-27
Supplement: Supplemental_Article_S1.pdf [file Supplemental_Article_S1.pdf]

# **Data quantity is more important than its spatial bias for predictive species distribution modelling**

## **1 Supplementary Article S1: Supplementary Methods and Results**

2 Willson Gaul<sup>1\*</sup>, Dinara Sadykova<sup>2</sup>, Hannah J. White<sup>1</sup>, Lupe León-Sánchez<sup>2</sup>, Paul Caplat<sup>2</sup>, Mark C.

3 Emmerson<sup>2</sup>, Jon M. Yearsley<sup>1</sup>

4 1. School of Biology & Environmental Sciences, University College Dublin, Dublin, Ireland

5 2. School of Biological Sciences, Queen's University Belfast, Belfast, UK

6 \* Corresponding author [willson.gaul@ucdconnect.ie](mailto:willson.gaul@ucdconnect.ie)

7

8 [remainder of this page intentionally blank]

9

10

11

12

13

14

15

## 16 **Supplementary methods**

### 17 **Environmental Predictor Variables**

18 We used average minimum annual temperature, average maximum annual temperature, average annual  
19 precipitation, and average daily sea level atmospheric pressure calculated over 12 years (1995 to 2016)  
20 from the E-OBS European Climate Assessment and Dataset EU project (Haylock et al., 2008; van den  
21 Besselaar, Haylock, van der Schrier, & Klein Tank, 2011;  
22 <http://www.ecad.eu/download/ensembles/downloadchunks.php>). For average minimum and maximum  
23 temperatures, we calculated the mean across all 12 years of the 2% and of the 98% quantiles of daily  
24 mean temperatures. For average annual precipitation, we summed daily precipitation within each year and  
25 calculated the mean annual precipitation over all years (excluding years 2010 through 2012 because of  
26 missing daily precipitation values in those years). For average daily sea level pressure we took the mean of  
27 daily sea level pressure over all 12 years. We calculated the value of each climate variable at the E-OBS  
28 grid points and then interpolated to Irish 10 km grid cells using ordinary kriging.

29 We calculated the proportion of each grid cell covered by each of the “agricultural areas”, “artificial  
30 surfaces”, “forest and semi-natural areas”, “water bodies”, and “wetlands” Label 1 categories from the  
31 CORINE Land Cover database (CORINE, 2012). We calculated the average elevation within each grid  
32 cell by interpolating using ordinary kriging from the ETOPO1 Global Relief Model (Amante & Eakins,  
33 2009; [https://www.ngdc.noaa.gov/mgg/global/relief/ETOPO1/data/ice\\_surface/grid\\_registered/netcdf/](https://www.ngdc.noaa.gov/mgg/global/relief/ETOPO1/data/ice_surface/grid_registered/netcdf/)  
34 [accessed 8 May 2019]).

35 Spatial clustering of predictor variable values was measured using Moran’s I calculated with the ‘Moran’  
36 function in the ‘raster’ R package (Hijmans, 2018).

### 37 **Simulating species distributions**

38 Coefficients specifying the virtual species' responses were chosen such that the theoretical prevalence of  
39 the species (the sum of the probabilities of presence in each grid square divided by the number of grid  
40 squares) was greater than 0.01 so that virtual species were common enough to be observed and modeled.  
41 Coefficients for the squared terms were randomly drawn from a uniform distribution between zero (which  
42 creates a straight-line response) and 1.3 (chosen because higher values produce response curves with  
43 narrow "humps", representing species with highly specialized environmental niches such that there would  
44 be very few occurrences within Ireland). The maximum coefficient value of 1.3 for the squared terms  
45 was chosen after exploring multiple values, with the goal of finding a value that regularly produced virtual  
46 species with theoretical prevalences across the entire study extent greater than 0.01 (corresponding to the  
47 species being present in about 8 grid cells in Ireland). Coefficients for 1<sup>st</sup> order terms were randomly  
48 drawn from a uniform distribution within minimum and maximum values chosen to ensure that the  
49 response to each predictor variable had an optimum within the range of values of the predictor variable  
50 within Ireland.

### 51 **Simulating sampling with spatial bias**

52 The reason for varying the probability of sampling a species according to species prevalence (Section  
53 2.4.3 of main text) was to simulate the real-world scenario in which species that are present in many  
54 locations also likely have higher abundances (Gaston et al., 2000) and are therefore more likely than rare  
55 species to be recorded in any single sampling event. We defined the probability of observing a species as  
56 the twentieth root of that species's prevalence in the entire study extent. The twentieth root was chosen  
57 based on exploratory trials in which we generated checklists with species sampling probability weights  
58 defined by different transformations of prevalence (e.g. raw prevalence, square root of prevalence, or

59 logarithm of prevalence) and looked at histograms of the number of observations per species and scatter  
60 plots of the number of observations of species by the prevalence of species. For many transformations of  
61 prevalence, including the logarithm of prevalence and the square root of prevalence, weighting sampling  
62 probability by the transformation generated sampled species lists that seemed badly unrealistic (e.g.  
63 weighting by raw prevalence produced checklists with almost only common species, and weighting by the  
64 natural logarithm of prevalence produced checklists of mostly rare species). Weighting by the twentieth  
65 root produced sampled species lists that seemed plausibly realistic in terms of the relative numbers of rare  
66 and common species sampled. Determining the probability of observing a species based on the species's  
67 prevalence in the overall study extent meant that the probability of observing a species when it was  
68 present was the same across the entire study extent.

69 Because we sampled occurrence records with replacement from the list of present species, it was  
70 possible for a species to appear on a sampling event checklist more than once. This matched the nature of  
71 many NBDC datasets in which some sampling event checklists were aggregations of records over long  
72 periods of time (e.g. all records from a location in a single year were aggregated and reported with an  
73 identical location and date). In those cases, a sampling event checklist may contain hundreds of records  
74 with many repeat observations of some species.

## 75 **Species distribution modeling**

76 Models were fitted with both five-fold block cross-validation and with no cross-validation (evaluating on  
77 the training data). Using block cross-validation is best practice, so only those results are presented in the  
78 main text. We included fitting with no cross-validation to confirm that prediction performance measures  
79 appear overly optimistic when evaluation is done without cross validation (as has been reported in the  
80 literature) (Roberts et al., 2017).

81 Spatial block cross-validation (Roberts et al., 2017) partitioned the study extent into spatial blocks of  
82 100 km x 100 km and then allocated each 100 km x 100 km block to one of five cross-validation  
83 partitions. The spatial position of the 100 km x 100 km blocks was determined randomly (by randomly  
84 setting an origin point for the grid). The exact number of 100 km x 100 km blocks required to cover the  
85 island of Ireland depended on the randomly-determined location of the grid cells. A 100 km x 100 km  
86 block could be (and often was) positioned partially over ocean. Therefore, not every 100 km x 100 km  
87 block contained the same number of terrestrial grid cells, and consequently not every block cross-  
88 validation fold contained the same number of terrestrial grid cells. Prediction performance (AUC and  
89 RMSE) of models was evaluated against true simulated species distributions at locations not included in  
90 the training set for each of the cross-validation folds, and AUC and RMSE values for all five cross-  
91 validation folds were averaged to produce the final values of AUC and RMSE describing the prediction  
92 performance of each model.

93 We provided five predictor variables to SDMs to model each species. The five predictor variables were  
94 chosen randomly from the 10 possible predictors (Table 1) in order to simulate a real-world situation in  
95 which the factors that influence species distributions are not entirely known, and variables used for  
96 modelling likely include a mix of important and unimportant variables. For GLMs, not all five predictor  
97 variables were necessarily used in the final model because of our model selection process (see below). All  
98 models used equal weights for presences and absences.

99 For the small community simulations, we fit models to 110 virtual species by creating three small  
100 communities, each with 40 virtual species (the number of recorded butterfly species in Ireland) and  
101 modelling all virtual species in each community except for the last community (from which we only  
102 modeled 30 virtual species).

103 *GLM*

104 We used a logistic regression ('glm' function in R) with a binomial error distribution and logit link to  
105 model the probability of a species being recorded during a sampling event. Quadratic terms for each of  
106 the five environmental predictor variables were fitted, but we did not fit interactions between variables.  
107 Within each of the five block cross validation (CV) partitions, we tested all possible models that contained  
108 few enough terms that there were at least 10 detections (or non-detections, whichever was smaller) per  
109 non-intercept term in the model. We chose as the final model the combination of predictor variables that  
110 gave the model with the lowest AIC based on the training data in that partition. Thus, the minimum  
111 model size was an intercept-only model, and the most complex model included an intercept plus 10  
112 additional terms (1<sup>st</sup> and 2<sup>nd</sup> degree terms for each of the five predictor variables chosen to model that  
113 species). First degree terms for a variable were always included if a second degree term was selected for  
114 that variable. Because the goal was to produce predictive models for a large number of species, we did not  
115 assess model assumptions for each individual species model.

116 *Boosted regression trees*

117 We trained boosted regression trees using the function 'gbm.step' in the 'dismo' R package (Greenwell,  
118 Boehmke, & Cunningham, 2018; Hijmans, Phillips, Leathwick, & Elith, 2017). We tested models with  
119 tree complexities of two and five. Smaller learning rates are generally preferred because they result in  
120 better predictive performance but higher computation and memory requirements (Elith, Leathwick, and  
121 Hastie 2008). Therefore, for each tree complexity (two and five), we first tried to train each model with a  
122 learning rate of 0.001. If the model used fewer than 1000 trees, we shrank the learning rate by 50% in  
123 order to try to get models that used of 1000 trees (as recommended by Elith, Leathwick, and Hastie  
124 2008). If no model could be fitted with more than 1000 trees and a learning rate of higher than 0.00001,

125 we abandoned model fitting for that training dataset. We used `gbm.step` to determine the optimal number  
126 of trees for each model, based on monitoring the change in 10-fold cross-validated error rate as trees were  
127 added to the model (Hijmans, Phillips, Leathwick, & Elith, 2017). We started models with 50 trees and  
128 added trees in increments of 50 (`step.size = 50`). If the model using the initial learning rate of 0.001 did  
129 not reach minimum error with fewer than 30,000 trees, we increased the learning rate incrementally by  
130 0.002 until either the model fit successfully with fewer than 30,000 trees or the learning rate got larger  
131 than 0.1. If no model could be fit with fewer than 30,000 trees and a learning rate smaller than 0.1, we  
132 abandoned model fitting for that training dataset. Finally, we compared the models fit with tree  
133 complexities of two and five, and the optimum learning rate and number of trees selected for each of  
134 those models. Of the two models with different tree complexities, we chose as the final model the one  
135 that had the lower cross-validation predictive deviance. We then generated SDM predictions using this  
136 final model.

### 137 *Inverse distance-weighted interpolation*

138 Within each grid cell, we calculated the proportion of sampling events on which the focal species was  
139 recorded. For each CV partition, we used the `'gstat'` function in R (Gräler et al., 2016; Pebesma, 2004) to  
140 predict the probability of recording the species during a sampling event in locations in the test partition by  
141 taking an inverse distance weighted average of proportions of training partition sampling events on which  
142 the species was recorded. The `'gstat'` arguments specifying the optimal power parameter and number of  
143 points to use were chosen in an automated way by testing all combinations of powers in increments of 0.5  
144 between 0 and 10 and number of points in increments of two between one and the maximum number of  
145 points in the training partition. We fit the final model for each CV partition using the combination of

146 power parameter and number of observations that resulted in the lowest three-fold cross-validated RMSE  
147 on data in the training partition.

#### 148 *Investigating possible overfitting*

149 After models were fitted, we looked for evidence of overfitting by inspecting graphs of 1) the number of  
150 predictor variables used by GLMs as a function of sample size, and 2) prediction performance (spatial  
151 block cross-validated AUC) as a function of the number of terms in GLMs and sample size. We also  
152 explored the effect of the constraints we placed on the computation time of boosted regression trees (i.e.  
153 limiting models to 30,000 or fewer trees) by inspecting boxplots of the number of trees used to fit models  
154 as a function of sample size and spatial sampling bias. Finally, we assessed the effect of species  
155 prevalence on model performance metrics by inspecting plots of AUC and RMSE as a function of species  
156 prevalence and as a function of the number of positive detections of the focal species in the test dataset.

#### 157 **Analyzing effects of sampling bias and sample size**

158 Our main analysis (reported in the main text) used boosted regression trees to model the predictive  
159 performance (AUC and RMSE) of SDMs as a function of spatial sampling bias and sample size (average  
160 number of observations per species), SDM method, and (in the case of RMSE) species prevalence. To  
161 assess whether our conclusions depended on the modeling method, we also used GAMs (Wood, 2017) to  
162 perform the same analysis of AUC and RMSE of SDMs as a function of spatial sampling bias and sample  
163 size (average number of observations per species), SDM method, and species prevalence. Using both  
164 boosted regression trees and GAMs provided a simple sensitivity test to ensure that our conclusions were  
165 not dependent on the choice of modelling method. We also used the GAM predictions of AUC to  
166 produce the contour lines in Fig. 8 of the main text because the smoother GAM function made the shape

167 of the contour lines easier to visually distinguish than contour lines produced with boosted regression tree  
168 predictions.

169 We used boosted regression trees to model AUC as a function of a categorical spatial sampling bias  
170 variable, the average number of observations per species, and SDM method. Boosted regression trees  
171 used a tree complexity of 3, a learning rate of 0.001, a Gaussian distribution, and the number of trees  
172 selected by the 'gbm.step' function in the 'dismo' R package.

173 We fit GAMs to model AUC and RMSE using the 'gam' function in the 'mgcv' R package. We fit  
174 separate GAMs to model the prediction performance of each of the four SDM modelling methods  
175 because three-way interactions cannot be specified in 'gam' and we expected three-way interactions. We  
176 modeled AUC as a function of a categorical spatial sampling bias variable and a smooth of the average  
177 number of observations per species by sampling bias (so that the response shape of AUC to sample size  
178 could vary with bias level). We modeled RMSE as a function of a categorical spatial sampling bias  
179 variable, a smooth of the average number of observations per species by sampling bias, and a smooth of  
180 species prevalence. We used a beta distribution and logit link, and smoothed the number of observations  
181 per species by sampling bias level using cubic regression splines with a basis dimension of five. The basis  
182 dimension was chosen by fitting multiple models with basis dimensions varying from two to six and  
183 looking at effective degrees of freedom and the shape of fitted smooths. We selected the basis dimension  
184 to be high enough that effective degrees of freedom were below the basis dimension and neither the shape  
185 of the smooth nor the basis dimension changed substantially when the basis dimension was increased.

186 Predictions were generated from fitted boosted regression trees and GAMs. We compared the expected  
187 value of AUC and RMSE for SDMs trained with data containing different amounts of spatial sampling  
188 bias and different sample sizes. Variable importance was assessed based on the reduction in squared error

189 attributed to each variable in the boosted regression tree models and based on the change in adjusted  $R^2$   
190 of GAMs when variables were removed from the full model.

191

## 192 **Supplementary Results & Discussion**

### 193 **Prediction performance of SDMs**

194 AUC and Kappa were lower when models were evaluated using spatial block cross-validation than when  
195 models were evaluated on the training data, as expected (Fig. S6, Fig. S7). Model evaluation on training  
196 data is known to be overly optimistic in most cases (Roberts et al., 2017), and our results confirm that. In  
197 particular, the drastic reduction in Kappa when evaluated with cross-validation indicated that our SDMs  
198 were poor at converting continuous SDM outputs into binary maps for locations outside the training  
199 partition (Fig. S6). AUC evaluated using cross-validation was still high enough to give some confidence  
200 that models could correctly rank locations (Fig. S7, Fig. 6, Fig. 7). Our SDMs therefore apparently differ  
201 in how well they generalize for different tasks: the SDMs had some ability to generalize when the task was  
202 ranking sites (measured using AUC), but were unable to generalize when the task was creating binary  
203 maps of presence and absence (measured using Kappa).

204 Analyses of the effects on prediction performance of spatial bias, average number of records per  
205 species, and SDM method were qualitatively similar when analyzed using boosted regression trees and  
206 GAMs, suggesting that our conclusions did not depend on the choice of error distribution or modeling  
207 technique (Fig. 6, Fig. S7).

208 *Investigating possible overfitting in GLMs and the effects of limiting computation time for boosted regression*  
209 *trees*

210 To avoid overfitting the GLM species distribution models, we used fewer terms in models when sample  
211 size was small, and only allowed more terms when sample size was large (Fig. S8). The poor  
212 performance of GLM species distribution models trained with small sample sizes cannot be attributed to  
213 overfitting, as GLMs used relatively few terms when sample size was small (Fig. S8). Out-of-sample  
214 prediction performance (AUC) of GLMs increased with the number of terms in models up to about three  
215 or four terms (Fig. S9). When sample size was intermediate (an average of 10 or 50 records per species),  
216 prediction performance then initially increased with the number of terms in models, then decreased when  
217 more terms were used, indicating possible overfitting (Fig. S9, panels C, D, and E). The possible  
218 overfitting was most pronounced for models trained with median or severely biased data with an average  
219 of 50 records per species (Fig. S9, panel D). This suggests that GLMs may have been overfitting at  
220 moderate sample sizes, despite us limiting the number of terms in models based on sample size. There  
221 was no evidence of overfitting at small sample sizes, mainly because models were restricted to using very  
222 few predictor variables (Fig. S9, panels A and B). Prediction performance of GLMs generally increased  
223 with sample size (Fig 5 in the main text), despite the evidence of possible overfitting at intermediate  
224 sample sizes suggested by Fig. S9. More careful model selection and control of overfitting in GLMs, for  
225 example by selecting the final model terms using cross-validation, could increase the prediction  
226 performance of models trained with moderate sample sizes even further. However, this would not change  
227 our main findings, and in fact would strengthen the pattern of prediction performance increasing with  
228 sample size (Fig. 5). Therefore, we do not think the evidence of some overfitting in GLMs affects the  
229 main conclusions of this study, namely that prediction performance of species distribution models is

230 affected more strongly by sample size and species distribution modelling method than by spatial sampling  
231 bias.

232 We limited boosted regression tree species distribution models to using fewer than 30,000 trees.  
233 However, most models fit with fewer than 10,000 trees (Fig. S10), and prediction performance was  
234 unrelated to the number of trees used, as long as number of trees was above about 2,000 (Fig. S11).  
235 Boosted regression trees failed to fit models for some species, especially when sample sizes were small  
236 (Fig. 4 of main text), perhaps because we abandoned model fitting if models did not successfully fit with  
237 30,000 or fewer trees. It is possible that given more computation time and larger numbers of trees,  
238 boosted regression trees could successfully fit models to more species. However, our assessment of the  
239 prediction performance of models was based only on models that *did* successfully fit. For those models  
240 that fit, we saw no indication that the prediction performance was limited by permitting models to use  
241 only up to 30,000 trees (Fig. S11). Rather, the majority of models fit with far fewer than 30,000 trees,  
242 (Fig. S10), and prediction performance was generally constant for models with numbers of trees from  
243 about 2,000 to 30,000 (Fig. S11). Any practical species distribution modelling will be done within the  
244 constraints of available computational resources. We do not think that increasing the maximum  
245 permissible number of trees for boosted regression trees above 30,000 would change the main conclusions  
246 of this study, namely that prediction performance of species distribution models is affected more strongly  
247 by sample size and species distribution modelling method than by spatial sampling bias.

#### 248 *Small community simulation*

249 Results from the small community simulation were qualitatively similar to results from the large  
250 community simulation (Fig. S12). Prediction performance was similar when models were trained with  
251 data showing no spatial bias or low spatial bias. Prediction performance was lower when models were

252 trained with data with median or severe spatial bias, at least for GLMs (Fig. S12). In the small  
253 community simulation, inverse distance-weighted interpolation appeared to be less affected by spatial bias  
254 than it was in the large community simulation. Despite this, GLMs trained with severely spatially biased  
255 data still outperformed the best inverse distance-weighted interpolation models (Fig. S12).

256

## 257 **References for Supporting Information**

258 Amante, C., & Eakins, B. W. (2009). ETOPO1 1 arc-minute global relief model: Procedures, data  
259 sources and analysis. NOAA Technical Memorandum NESDIS NGDC-24. National Geophysical Data  
260 Center, NOAA. doi: 10.7289/V5C8276M [accessed 8 May 2019].

261 Breiman, L. (2001). Random forests. *Machine Learning*, 45, 5–32.

262 CORINE land cover database. (2012). Version 18. © European Union, Copernicus Land Monitoring  
263 Service 2016, European Environment Agency (EEA). Retrieved from  
264 [https://www.eea.europa.eu/ds\\_resolveuid/ecb838dabf4849838ba5f3dc81ca6b0e](https://www.eea.europa.eu/ds_resolveuid/ecb838dabf4849838ba5f3dc81ca6b0e) [8 Aug 2016].

Gaston, K. J., Blackburn, T. M., Greenwood, J. J. D., Gregory, R. D., Quinn, R. M., & Lawton, J. H.  
(2000). Abundance-occupancy relationships. *Journal of Applied Ecology*, 37, 39–59.

265 Gräler, B., Pebesma, E., & Heuvelink, G. (2016). Spatio-temporal interpolation using gstat. *The R*  
266 *Journal*, 8, 204–218.

267 Greenwell, B., Boehmke, B., Cunningham, J., & GBM Developers. (2018). *gbm: Generalized boosted*  
268 *regression models*. R package version 2.1.4.

269 Haylock, M. R., Hofstra, N., Klein Tank, A. M. G., Klok, E. J., Jones, P. D., & New, M. (2008). A  
270 European daily high-resolution gridded data set of surface temperature and precipitation for 1950-  
271 2006. *Journal of Geophysical Research*, 113, D20119.

272 Hijmans, R. J. (2018). *raster: Geographic data analysis and modeling*. R package versions 2.8-4 and 2.9-  
273 23.

274 Hijmans, R. J., Phillips, S., Leathwick, J., & Elith, J. (2017). *dismo: Species distribution modeling*. R  
275 package version 1.1-4.

276 Liaw, A., & Wiener, M. (2002). Classification and regression by randomForest. *R News*, 2, 18–22.

277 Pebesma, E. J. (2004). Multivariable geostatistics in S: The gstat package. *Computers & Geosciences*, 30,  
278 683–691.

279 Roberts, D. R., Bahn, V., Ciuti, S., Boyce, M. S., Elith, J., Guillera-Arroita, G., ... Dormann, C. F.  
280 (2017). Cross-validation strategies for data with temporal, spatial, hierarchical, or phylogenetic  
281 structure. *Ecography*, 40, 913–929.

282 van den Besselaar, E. J. M., Haylock, M. R., van der Schrier, G., & Klein Tank, A. M. G. (2011). A  
283 European daily high-resolution observational gridded data set of sea level pressure. *Journal of*  
284 *Geophysical Research Atmospheres*, 116, D11110.

285 Wood, S. N. (2017). *Generalized additive models: An introduction with R* (2<sup>nd</sup> ed.). Boca Raton, FL:  
286 CRC Press.
