# Supplementary material for: Data quantity is more important than its spatial bias for predictive species distribution modelling
Source: PeerJ journal article supplement (doi:10.7717/peerj.10411), 2020-11-27

**minimum.temperature**

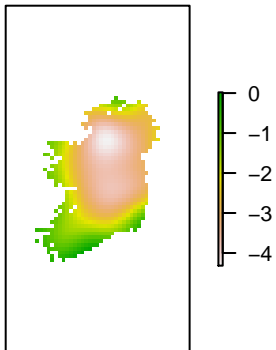

**maximum.temperature**

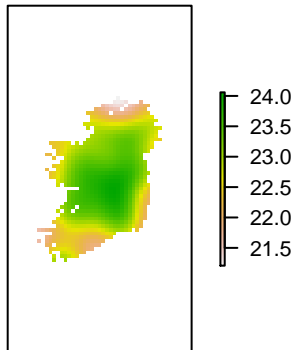

**annual.precipitation**

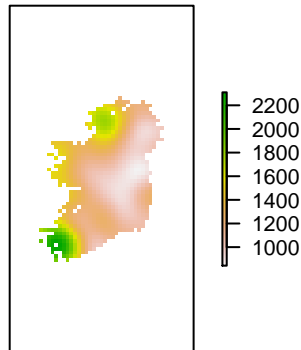

**atmospheric.pressure**

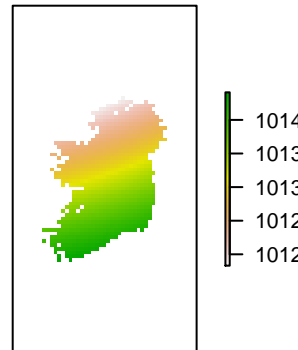

**agricultural.areas**

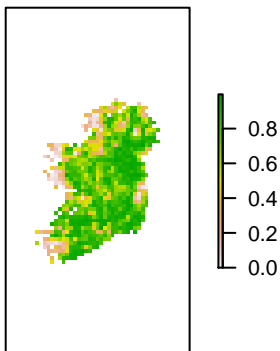

**artificial.surfaces**

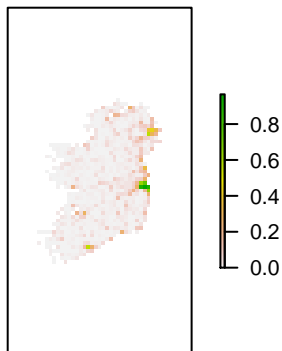

**forest.semi.natural**

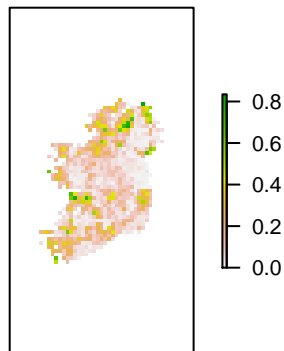

**wetlands**

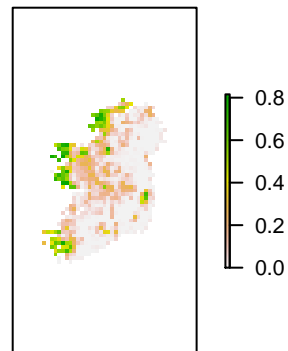

**water.bodies**

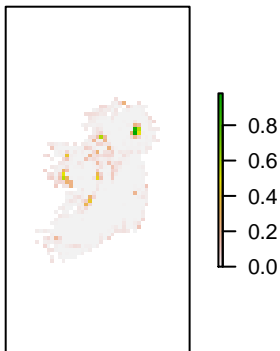

**elevation**

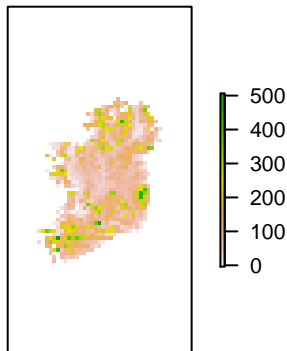

Supplement: Supplemental_Figure_S1.pdf [file Supplemental_Figure_S1.pdf]
