# Supplementary material for: Data quantity is more important than its spatial bias for predictive species distribution modelling
Source: PeerJ journal article supplement (doi:10.7717/peerj.10411), 2020-11-27
Supplement: Supplemental_Figure_S2.pdf [file Supplemental_Figure_S2.pdf]

A

| checklist ID | longitude | latitude | list length | species name |
|--------------|-----------|----------|-------------|--------------|
| L14          | 75000     | 85000    | 4           | sp2          |
| L14          | 75000     | 85000    | 4           | sp6          |
| L14          | 75000     | 85000    | 4           | sp5          |
| L14          | 75000     | 85000    | 4           | sp1          |

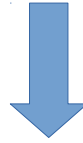

B

| checklist ID | longitude | latitude | list length | sp 1 | sp 2 | sp 3 | sp 4 | sp 5 | sp 6 | sp 7 | ... | sp240 |
|--------------|-----------|----------|-------------|------|------|------|------|------|------|------|-----|-------|
| L14          | 75000     | 85000    | 4           | 1    | 1    | 0    | 0    | 1    | 1    | 0    | ... | 0     |
